# Supplementary material for: Deep Flow Cytometry Unveils Distinct Immune Cell Subsets in Inducible T Cell Co-Stimulator Ligand (ICOSL)- and ICOS-Knockout Mice during Experimental Autoimmune Encephalomyelitis
Source: MDPI journal article supplement (doi:10.3390/ijms25052509), 2024-02-21
Supplement: s1 [file s1]

## Supplementary Material

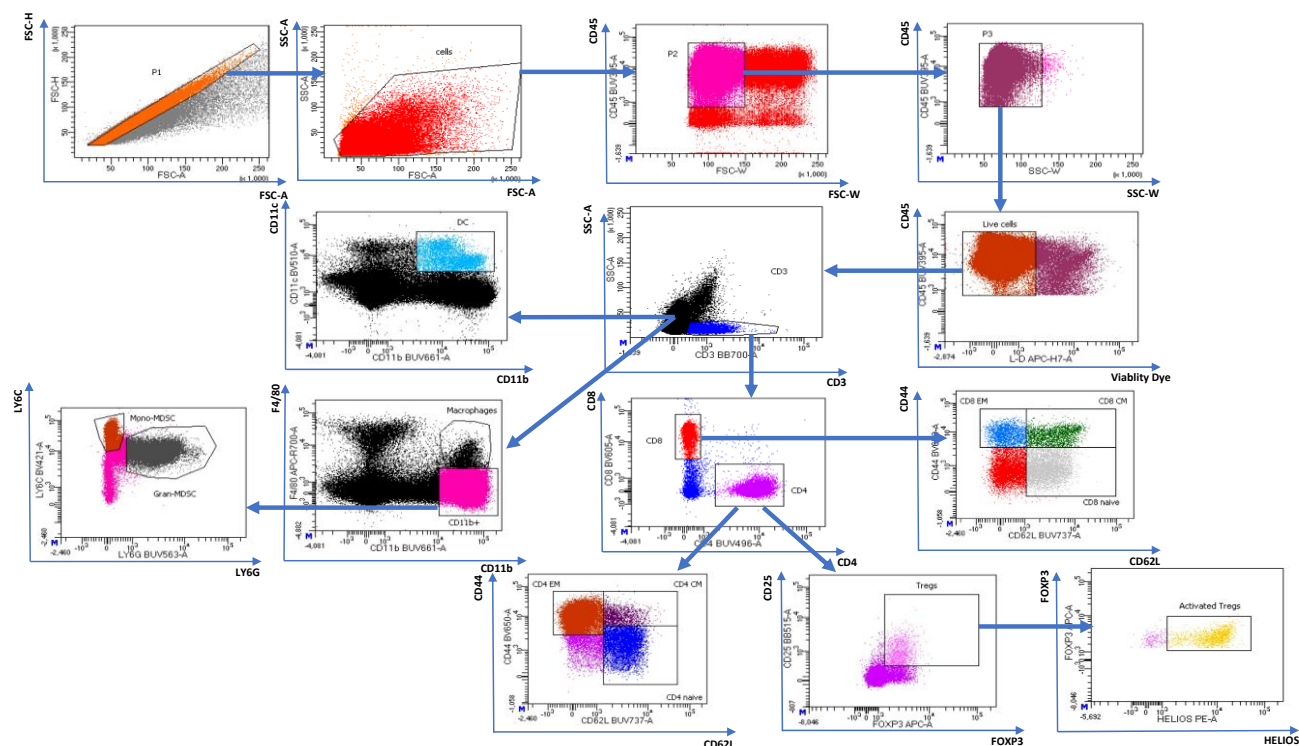

**Supplementary Figure S1.** Gating strategy. Arrows describe the hierarchical sequences of analysis. Singlets were selected from the FSC-A versus FSC-H dot plot and cells were gated based on SSC-A versus FSC-A. Then, CD45<sup>+</sup> positive cells were discriminated accordingly to the width parameter (FSC-W, SSC-W) and dead cells were excluded with the viability dye. Based on CD45<sup>+</sup> live cells, T cells were identified as CD3<sup>+</sup>. CD4<sup>+</sup> and CD8<sup>+</sup> T cells were identified accordingly to the expression of their surface markers. In both CD4 and CD8 subsets, naïve cells were classified as CD44<sup>-</sup> CD62L<sup>+</sup>, central memory cells as CD44<sup>+</sup> CD62L<sup>+</sup> (C<sub>M</sub>) and effector memory cells (E<sub>M</sub>) as CD44<sup>+</sup> CD62L<sup>-</sup>. Tregs cells were classified as CD4<sup>+</sup> CD25<sup>+</sup> Foxp3<sup>+</sup> and activated Tregs as Foxp3<sup>+</sup> Helios<sup>+</sup>. On CD3<sup>-</sup> cells, dendritic cells (DC) were classified as CD11b<sup>+</sup> CD11c<sup>+</sup> cells and macrophages as CD11b<sup>+</sup> F4/80<sup>+</sup> cells. Finally, on CD11<sup>+</sup> cells, monocytic myeloid suppressor cells (MDSC) and granulocytic -MDSC were

[illegible]

2

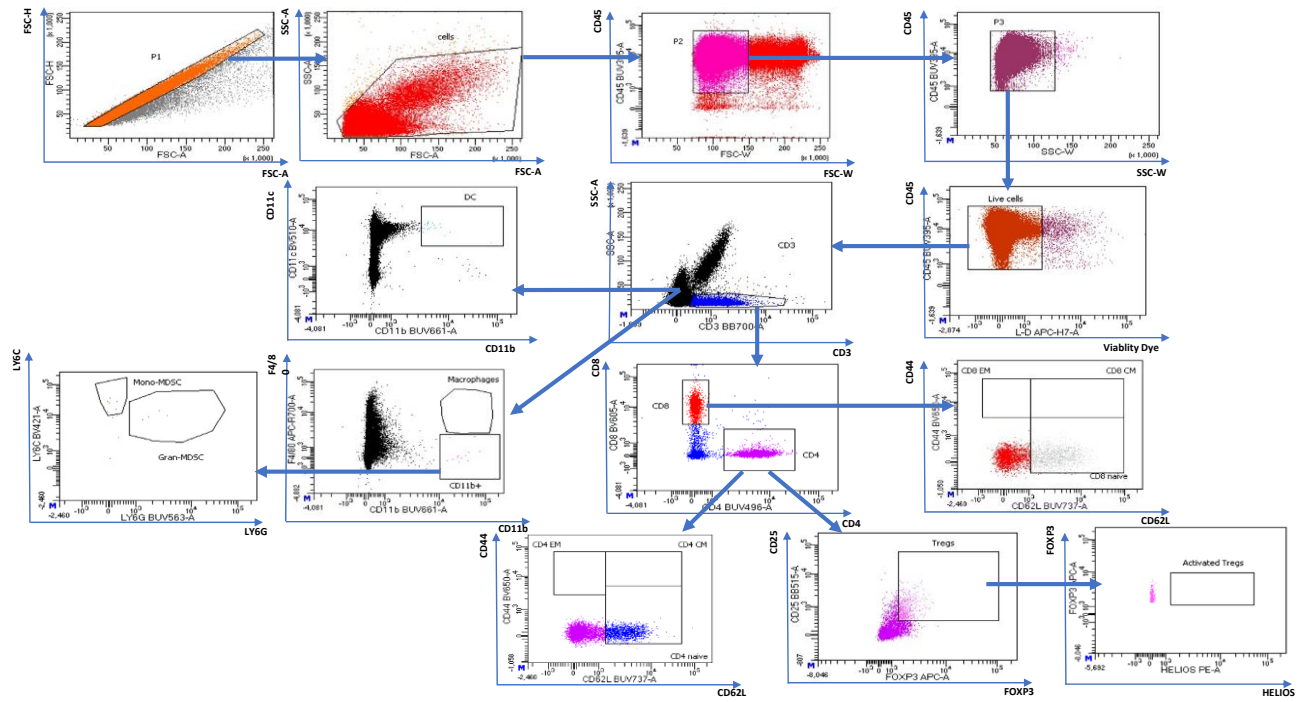

**Supplementary Figure S3.** Gating strategy, described in supplementary figure 1, showing the FMO controls for anti-CD11b, anti-CD44 and anti-Helios mouse monoclonal antibodies.
